# Supplementary material
Source: PubMed Central journal article supplement (PMC307551)

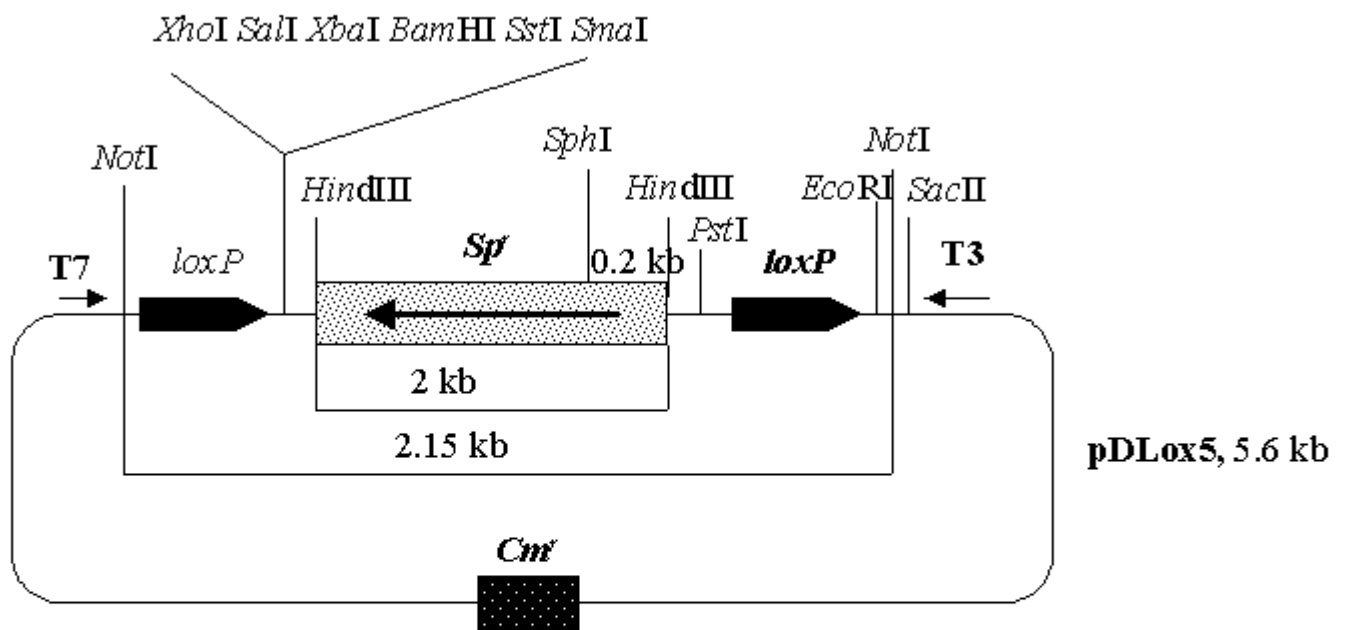


***loxP*** ATAACTTCGTATA GCATACAT TATACGAAGTTAT

Fig. S1

Supplement: mbc_15_1_332__1.pdf [file mbc_15_1_332__1.pdf]

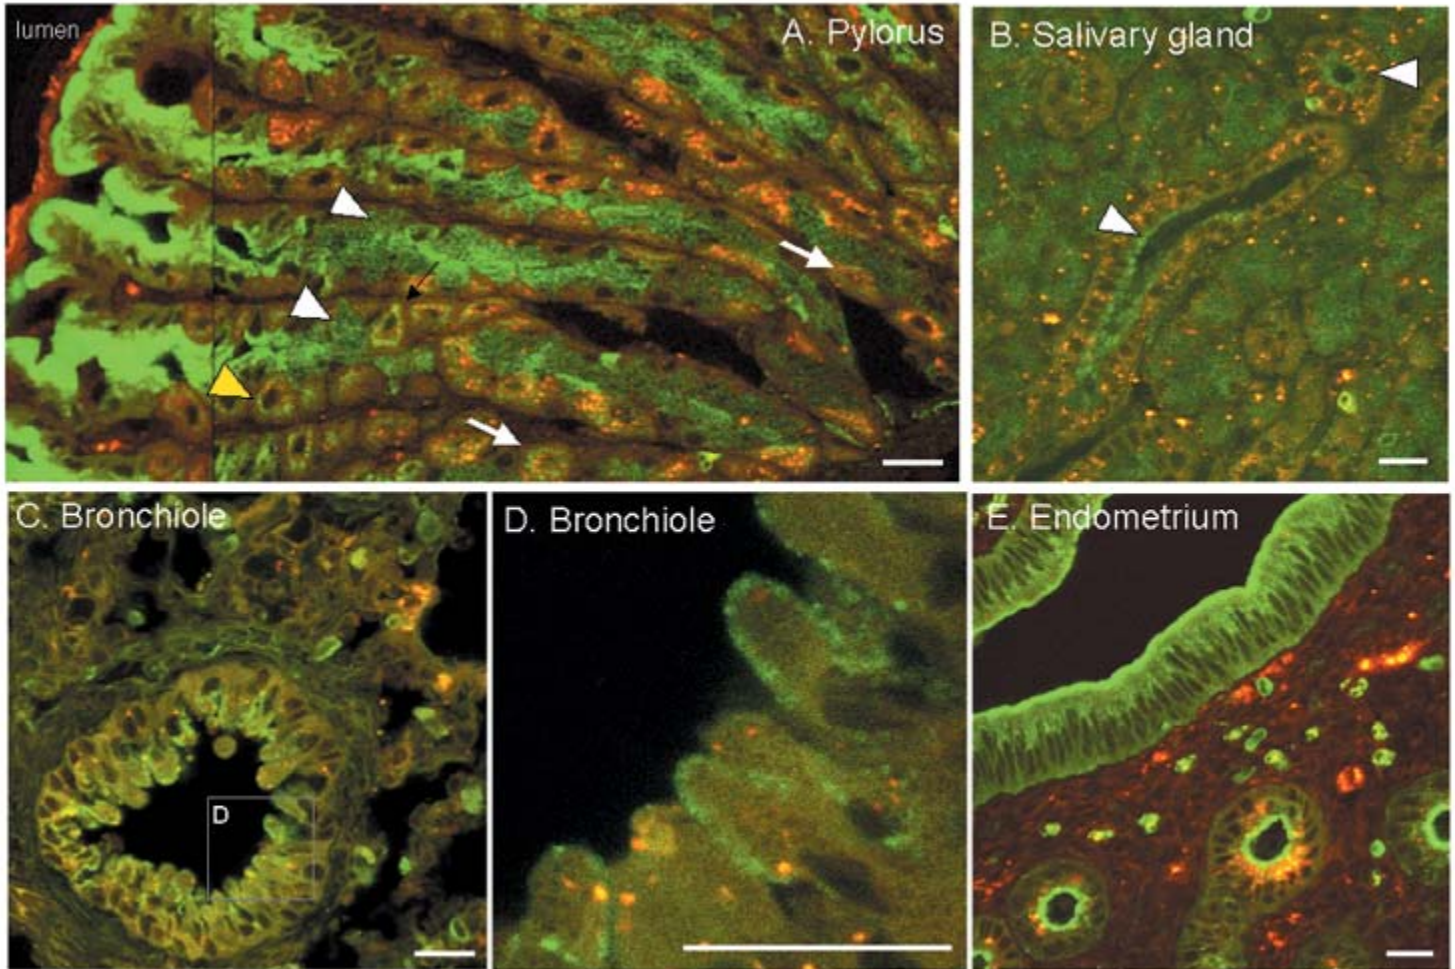

Fig. S2

Supplement: mbc_15_1_332__2.pdf [file mbc_15_1_332__2.pdf]
